# Supplementary material for: Oxygen vacancy and valence engineering in CeO2 through distinct sized ion doping and their impact on oxygen reduction reaction catalysis
Source: Royal Society of Chemistry journal article supplement (doi:10.1039/d2dt03198a), 2022-01-01
Supplement: d2dt03198a1.pdf [file d2dt03198a1.pdf]

## Oxygen Vacancy and Valence Engineering in CeO<sub>2</sub> through distinct sized ion doping and their impact on oxygen reduction reaction catalysis

Debarati Das<sup>1,2</sup>, Jyoti Prakash<sup>3,2</sup>, U.K. Goutam<sup>4</sup>, S. Manna<sup>5,2</sup>, Santosh K. Gupta<sup>1,2</sup># and K. Sudarshan<sup>1,2,\*</sup>

<sup>1</sup>Radiochemistry Division, Bhabha Atomic Research Centre, Mumbai-400085, India

<sup>2</sup>Homi Bhabha National Institute, Anushaktinagar, Mumbai – 400094, India

<sup>3</sup>Materials Group, Bhabha Atomic Research Centre, Mumbai-400085

<sup>4</sup>Technical Physics Division, Bhabha Atomic Research Centre, Mumbai-400085, India

<sup>5</sup>Analytical Chemistry Division, Bhabha Atomic Research Centre, Mumbai-400085, India

Corresponding author's \*[kathis@barc.gov.in](mailto:kathis@barc.gov.in); #[santoshg@barc.gov.in](mailto:santoshg@barc.gov.in)

### S1. Sample preparation

Undoped and the three different trivalent rare-earths (Y<sup>3+</sup>, Eu<sup>3+</sup> and La<sup>3+</sup>) doped CeO<sub>2</sub> samples were synthesized via gel combustion method using cerium nitrate hexahydrate and urea as the oxidant and fuel, respectively. The fuel to oxidant ratio was kept at 2:1 for all the samples. The trivalent ion doping was carried out at two different molar concentrations of 2.5% and 5% w.r.t. the number of moles of ceria. To prepare the Y<sup>3+</sup> and La<sup>3+</sup> doped ceria samples, stoichiometric amounts of lanthanum nitrate hexahydrate and yttrium nitrate were directly added to the precursor mixture, whereas to synthesize the Eu<sup>3+</sup> doped samples initially a stock solution of Eu<sup>3+</sup> was prepared by dissolving Eu<sub>2</sub>O<sub>3</sub> in dil. HNO<sub>3</sub> and then requisite amount of that solution was added to the fuel-oxidant mixture. The sample solutions were heated under the IR lamp for approximately an hour to get converted into the gel form. The gel was then initially ignited for few minutes at 250 °C for the combustion of urea, followed by crushing, calcinations for three hours at 500 °C and then finally annealed at 800 °C for four hours.

## S2. Electrochemical studies:

**Table S1:** The values of the different parameters obtained from fitting Nyquist impedance plots with equivalent circuit given in inset of figure 4(c)

| Sample Dopant in CeO <sub>2</sub> | Resistance of the electrolyte (R <sub>1</sub> in ohm) | Resistance of catalyst (R <sub>2</sub> in ohm) | Constant phase element (Q <sub>1</sub> in F) | Electron transfer resistance (R <sub>3</sub> in ohm) | Double layer capacitance (C <sub>3</sub> in F) |
|-----------------------------------|-------------------------------------------------------|------------------------------------------------|----------------------------------------------|------------------------------------------------------|------------------------------------------------|
| undoped                           | 211                                                   | 7153                                           | 9.4E-6                                       | 13000                                                | 3.21E-3                                        |
| 2.5% Y <sup>3+</sup>              | 159                                                   | 3589                                           | 5.59E-6                                      | 6591                                                 | 7.5E-3                                         |
| 5% Y <sup>3+</sup>                | 201                                                   | 3166                                           | 5.21E-6                                      | 6193                                                 | 7.62E-3                                        |
| 2.5% Eu <sup>3+</sup>             | 166                                                   | 5346                                           | 6.93E-6                                      | 10159                                                | 4.68E-3                                        |
| 5% Eu <sup>3+</sup>               | 147                                                   | 5591                                           | 7.58E-6                                      | 11201                                                | 4.91E-6                                        |
| 2.5% La <sup>3+</sup>             | 212                                                   | 3305                                           | 4.98E-6                                      | 6950                                                 | 6.01E-3                                        |
| 5% La <sup>3+</sup>               | 159                                                   | 1725                                           | 4.03E-6                                      | 4131                                                 | 5.49E-3                                        |
